# Supplementary material
Source: PubMed Central journal article supplement (PMC4394271)
Supplement: pnas.201503940SI.pdf [file pnas.201503940SI.pdf]

# Supporting Information

Friedman et al. 10.1073/pnas.1503940112

## SI Materials and Methods

Although we expect our algorithm to be readily adaptable to a broad range of data, we have optimized it for use on tetrode data collected from the rat striatum and cortex. The electrophysiological data acquisition software (Neuralynx Cheetah) records 1-ms time windows triggered when the voltage crosses a threshold. In our MATLAB implementation of this algorithm, specific parameters (e.g., types of interpolation) can be entered as options in a configuration file. This approach gives the user flexibility in optimizing the algorithm for specific datasets.

Our algorithm can be divided into three main parts (Fig. 1C): (i) in preprocessing, the candidate spike data are prepared and the SNR is enhanced; (ii) in the core algorithm, a transformed feature space is constructed, and clusters and subclusters are found and refined. The core algorithm and part of the preprocessing are iterated on the unsorted data until a criterion is met; (iii) in postprocessing, nearly simultaneous candidate spikes removed during preprocessing are assigned to clusters, and cluster quality is evaluated.

**Preprocessing.** Our algorithm begins with several steps of preprocessing, including stationarity, spike amplitude SNR, and local density filtering, to increase the SNR and to enhance the effectiveness of the core clustering algorithm (Fig. 1C and D). The spike amplitude SNR and local density filters are applied to the unsorted data at the beginning of each iteration of the algorithm except for the final one.

**Initial Spike Selection.** During data acquisition, when a 1-ms recording window is triggered by a threshold crossing, additional nearly simultaneous candidate spikes may also be recorded within the same time window. Our algorithm temporarily removes such spikes. The temporarily removed spikes are ultimately added back to clusters during postprocessing, after all of the iterations of the algorithm are completed (Fig. S1D).

**Stationarity Filter.** The algorithm removes candidate spikes in time bins containing a number of spikes more than five SDs above the mean; this removes noise consisting of rapid voltage deflections, which probably occur as a result of mechanical problems (e.g., a transient loose connection or bumping of the tetrode microdrive assembly and headstage preamplifier). This noise usually appears along the diagonal in peak vs. peak plots (Fig. S2).

**Core Algorithm.** The core algorithm consists of three main parts: (i) initial feature space construction, dimension evaluation, and spatial transformation, in which a transformed feature space is constructed by scaling dimensions (features) according to their importance; (ii) recursive clustering; and (iii) rebuilding the cluster from the core (Fig. 1C and D). The SNR and local density filters and the core algorithm are iterated to find additional clusters. After each iteration, the resulting clusters are removed from the candidate spike data. As described in *Spike Amplitude SNR Filter* of the main text, the SNR criterion level is decreased in each iteration. In the final iteration, the algorithm omits the SNR and local density filters to look for valid clusters that might have been filtered out. Evaluation of dimensions according to their contribution to separability is an essential part of our algorithm. Evaluation refers to the determination of the relative importance of selected dimensions.

**Initial Feature Space Construction.** The algorithm constructs a feature space of 13 dimensions (Fig. 1C): four peak voltage dimensions (one for each tetrode channel), eight PC dimensions (PC1 and PC2 of the candidate spike waveforms recorded for each of the four tetrode channels), and three peak PC dimensions (PC1, PC2, and PC3 of the peak voltages on the four channels). The peak voltages on the four channels together can be viewed as a signature reflecting, in part, the location of the neuron relative to the four wires (Fig. 1A and B).

As a final step, each dimension (peak voltage, PC, or peak PC) is independently z-score normalized. In most cases, when performing PCA, we apply a mean subtraction that focuses it on the variability in the shape of the waveform rather than on vertical shifts of the entire waveform. The initial space for each of the four channels consists of  $n$  dimensions, where each dimension is the voltage at one time point of the interpolated, peak-aligned, and padded waveform within the 1.25-ms time window. The waveform recorded in each channel is subtracted by the mean of the points within that waveform. This procedure contrasts with the built-in MATLAB function `pca`, which would subtract the waveform in each channel by the mean of all waveforms (over time) in that channel. This MATLAB version of PCA would be vulnerable to variability involving vertical shifts of the whole waveform. We attribute most of this type of variability to a background of multiunit activity. As a result of this variability, the MATLAB version of PCA would not be focused on the variability in waveform shape that is relevant to clustering, whereas our version of PCA is able to focus on this variability.

We use the MATLAB version of PCA only for calculating peak PC. In this case, each channel contributes only one dimension to the initial 4D space—namely, its peak voltage. Because the vertical shifts are expected to be different for the four channels, subtracting the mean peak voltage of the four channels would not be helpful.

**Dimension Evaluation.** MPC, an index of cluster validity, is an adaptation of the partition coefficient defined by Bezdek (1, 2) that reduces its monotonic tendency with respect to  $c$  (3). The MPC value  $m$  is defined as

$$m = 1 - \frac{c}{c-1} (1 - V_{PC}),$$

where  $V_{PC}$  is the partition coefficient defined by Bezdek:

$$V_{PC} = \frac{1}{n} \sum_{i=1}^c \sum_{j=1}^n u_{ij}^2.$$

Here,  $n$  is the number of vectors (e.g., spikes) in the multidimensional space,  $c$  is the number of clusters, and  $u_{ij}$  refers to the entries in the partition matrix  $U$ . For our case,  $u_{ij}$  gives the degree of membership of spike  $j$  in cluster  $i$  on a scale from 0 to 1.

**Fuzzy C-Means Clustering.** Having prepared a suitable space, the algorithm runs FCM clustering multiple times on the distribution in this space, assuming different numbers of clusters in each run. The correct number of clusters is the number that maximizes the MPC value (Fig. S4). Instead of randomly initializing FCM, we use a heuristic that deterministically produces the initial centers of each cluster. Our heuristic does not guarantee a global minimum for the FCM objective function.
